# Supplementary material for: Caveolin-1 Expression Increases upon Maturation in Dendritic Cells and Promotes Their Migration to Lymph Nodes Thereby Favoring the Induction of CD8+ T Cell Responses
Source: PubMed Central journal article supplement (PMC5733362; doi:10.3389/fimmu.2017.01794), 2017-12-13
Supplement: Image_1.pdf [file Image_1.pdf]

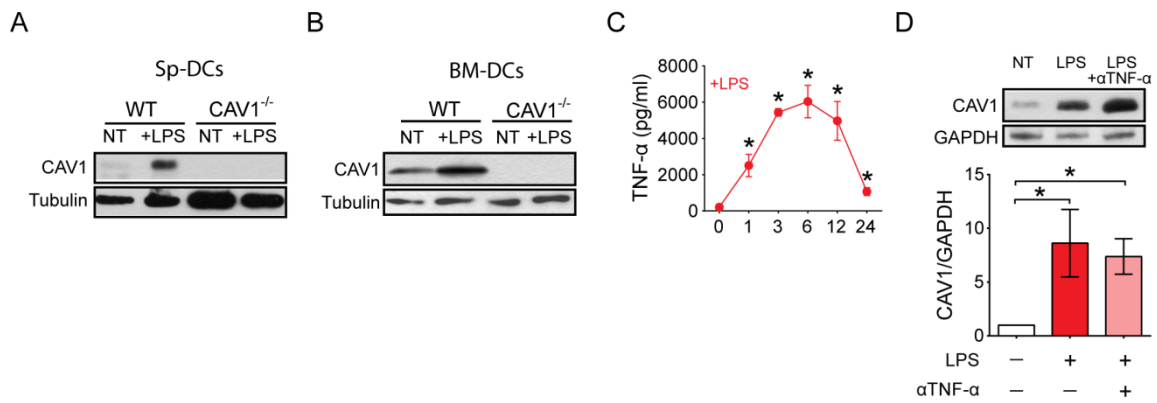

**S1. Specific detection of caveolin-1 expression in DCs.** Sp-DCs (**A**) and BM-DCs (**B**) were treated with LPS (100 ng/ml) for 24 h or 6 h, respectively, and caveolin-1 expression was determined by Western blotting. Bars are the mean  $\pm$  SEM (\* =  $p < 0.05$  v/s non-treated condition (NT) or as indicated,  $n = 3$ ). (**C**) Time-dependent TNF- $\alpha$  secretion induced by LPS. BM-DCs were stimulated with LPS (100 ng/ml) 0, 1, 3, 6, 12 or 24 h and then supernatants were collected and TNF- $\alpha$  secretion was determined by ELISA. Dots are the mean  $\pm$  SEM (\* =  $p < 0.05$  v/s 0h treatment,  $n = 3$ ). (**D**) TNF- $\alpha$  blockade following LPS- stimulation. BM-DCs were treated with LPS or a combination of TNF- $\alpha$  blocking antibody (5  $\mu$ g/ml) plus LPS for 6 h and caveolin-1 expression was determined by Western blotting. Bars or dots are the mean  $\pm$  SEM (\* =  $p < 0.05$  v/s NT or as indicated,  $n = 3$ ).
