# Supplementary material for: Caveolin-1 Expression Increases upon Maturation in Dendritic Cells and Promotes Their Migration to Lymph Nodes Thereby Favoring the Induction of CD8+ T Cell Responses
Source: PubMed Central journal article supplement (PMC5733362; doi:10.3389/fimmu.2017.01794), 2017-12-13
Supplement: Image_2.pdf [file Image_2.pdf]

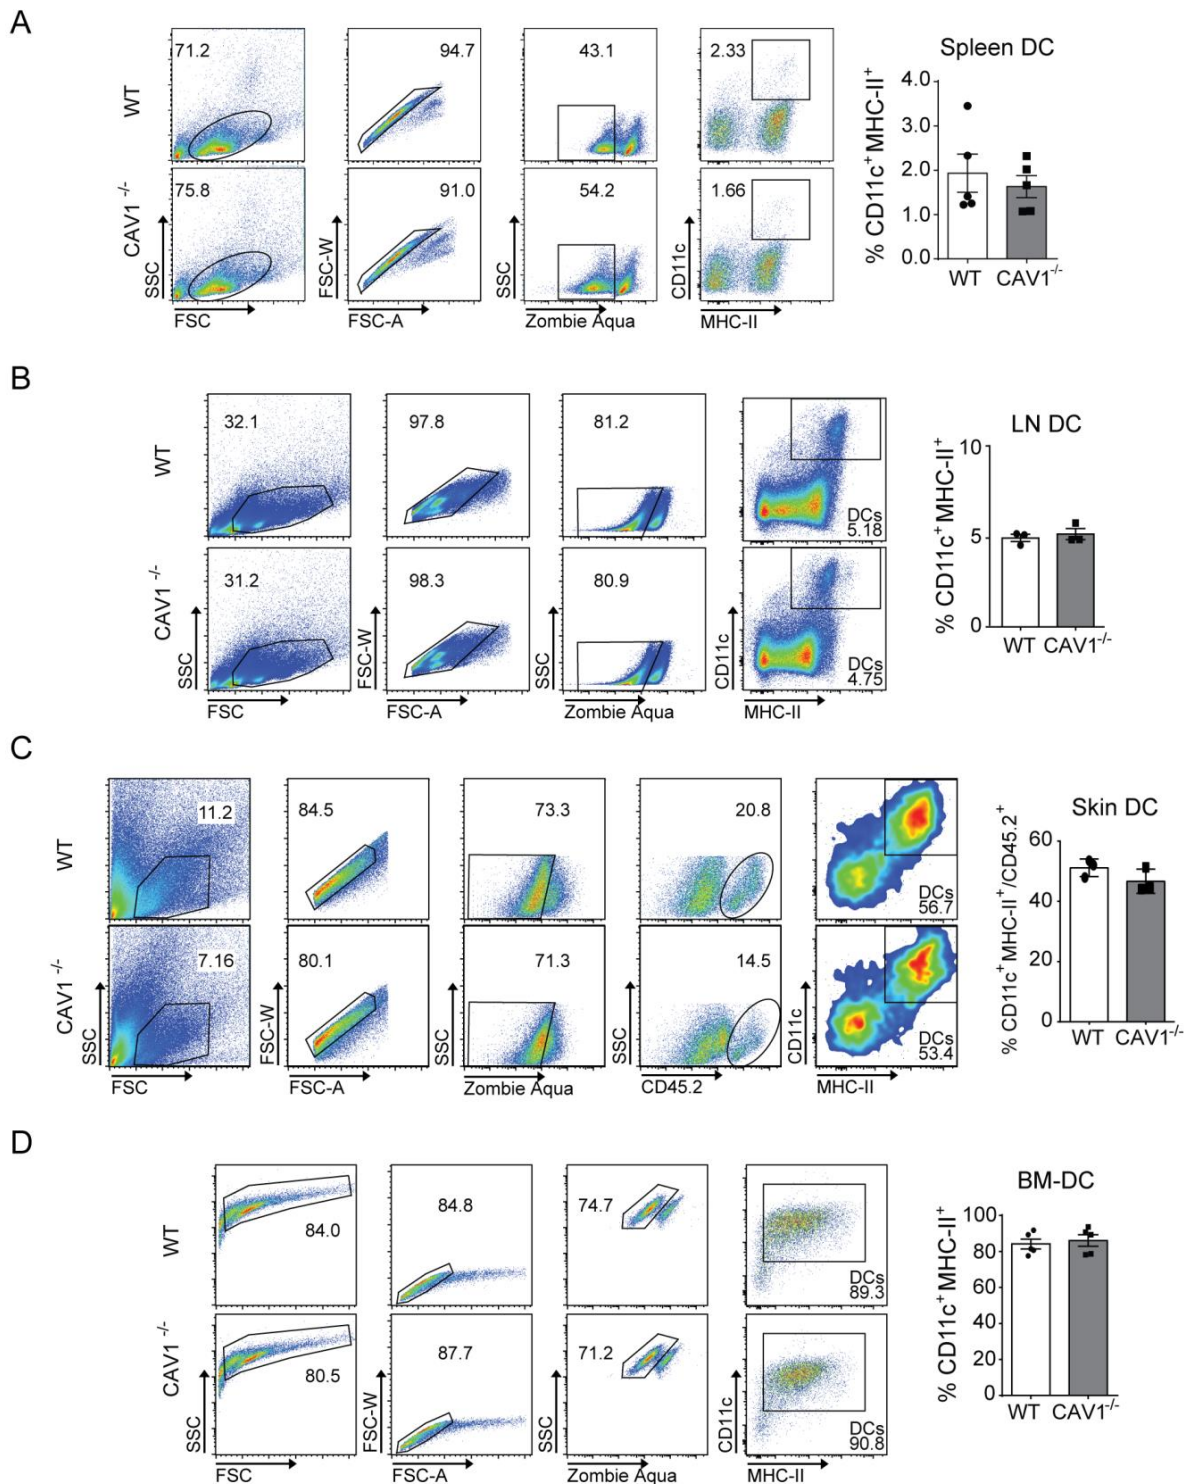

**S2. Caveolin-1 is not involved in DC differentiation.** (A),(B) DC percentage in spleen (A) or lymph nodes (B). WT and CAV1<sup>-/-</sup> mice were sacrificed and spleen and inguinal lymph nodes were obtained and digested in RPMI plus collagenase IV (5 mg/ml) and DNase I (5 mg/ml) for 45 min. Then, cells were stained (30 min) with anti-CD11c, anti-MHC-II and Zombie Aqua, washed and fixed with a PBS/paraformaldehyde 4% solution and then evaluated by flow cytometry. The percentage of cells CD11c<sup>+</sup>MHC-II<sup>high</sup>ZA<sup>neg</sup> was assessed. Each dot represents one animal and the bar is the mean (n = 5 for spleen, n=3 for lymph node). (C) Skin from WT and CAV1<sup>-/-</sup> mice skin was processed to obtain a single cell

suspension. Briefly, WT and *CAV1*<sup>-/-</sup> mice were sacrificed, shaved and skin pieces of 1 cm<sup>2</sup> were digested using a solution containing collagenase IV (5 mg/ml) and DNase I (5 mg/ml) for 1 h. Then, cells were stained (30 min) with anti-CD45, anti-CD11c, anti-MHC-II and Zombie Aqua, washed and fixed with a PBS/paraformaldehyde 4% solution and then evaluated by flow cytometry. The percentage of cells CD45<sup>+</sup>CD11c<sup>+</sup>MHC-II<sup>high</sup>ZA<sup>neg</sup> was assessed. Each dot represents one animal and the bar is the mean (n = 3). **(D)** Bone marrow cells from WT or *CAV1*<sup>-/-</sup> mice were cultured for 6 days in medium containing GM-CSF (20 ng/ml) to generate BM-DCs. Then, cell viability (Zombie Aqua) and CD11c<sup>+</sup>MHC-II<sup>+</sup> was assessed by flow cytometry. No differences were observed in CD11c expression between BM-DCs from both mouse strains (n=5).
