# Supplementary material for: Caveolin-1 Expression Increases upon Maturation in Dendritic Cells and Promotes Their Migration to Lymph Nodes Thereby Favoring the Induction of CD8+ T Cell Responses
Source: PubMed Central journal article supplement (PMC5733362; doi:10.3389/fimmu.2017.01794), 2017-12-13
Supplement: Image_3.pdf [file Image_3.pdf]

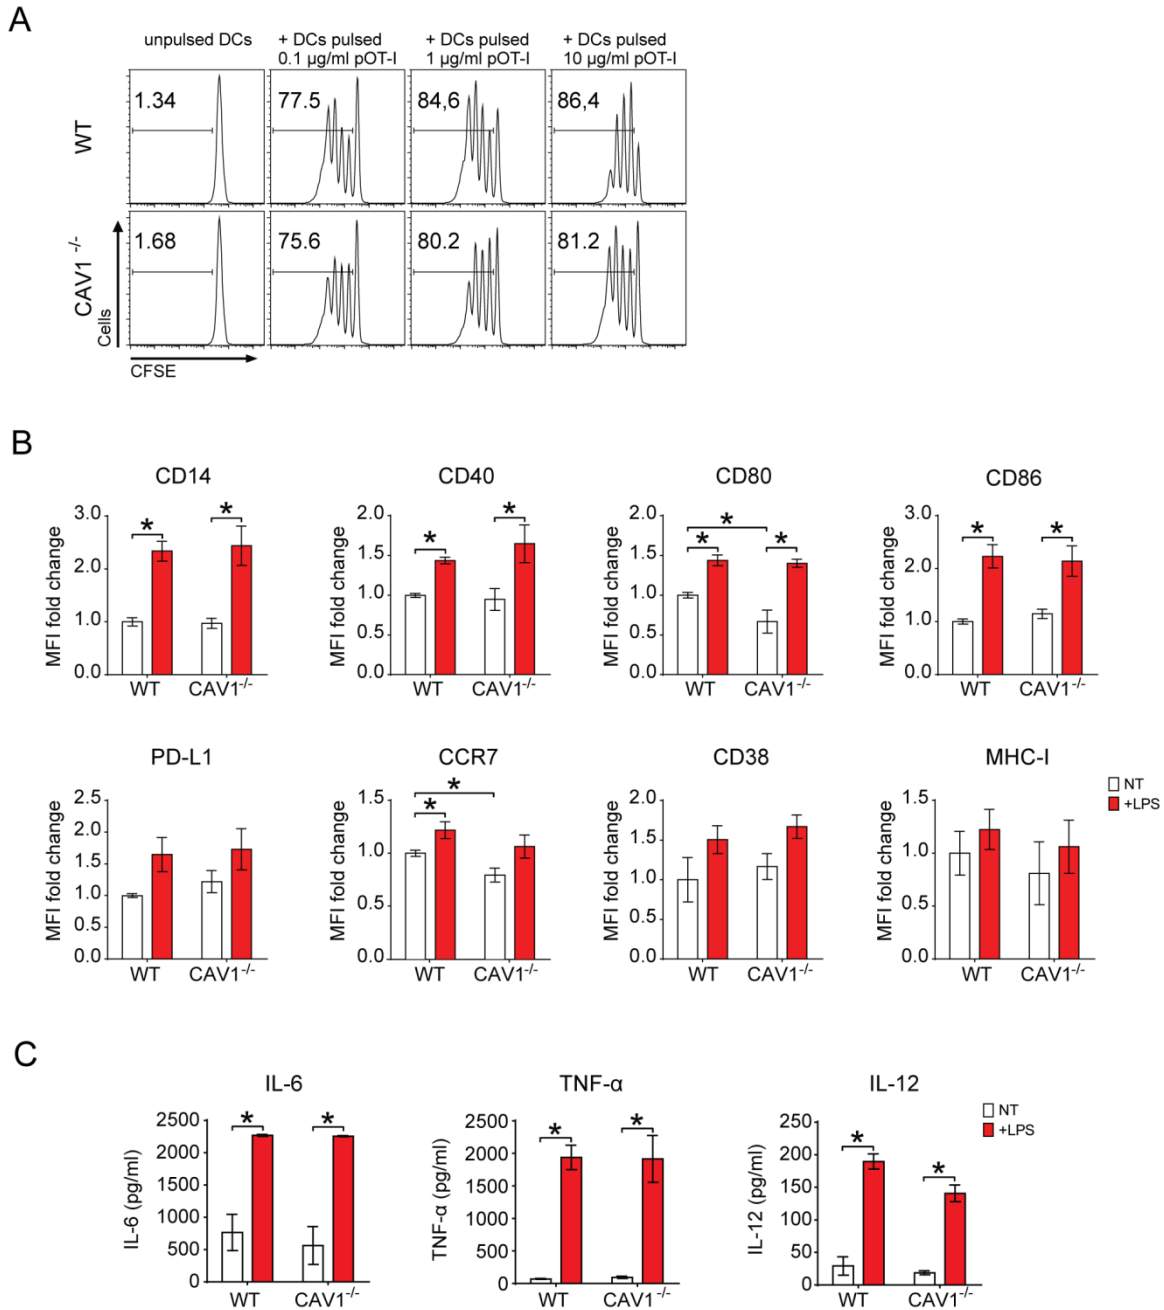

**S3. Caveolin-1 is not involved in DC maturation and antigen-specific activation of CD8<sup>+</sup> T cells *in vitro*.** (A) WT or CAV1<sup>-/-</sup> DCs were loaded with OVA<sub>257-265</sub> peptide and co-cultured with OT-I CD8<sup>+</sup> T cells (1:20, DC:T cell). *Ex vivo* OT-I CD8<sup>+</sup> T cell proliferation induced by OVA<sub>257-265</sub> peptide-pulsed DCs was evaluated after 3 days of co-culture. Representative histograms showing proliferation profiles of OT-I CFSE<sup>+</sup>CD3<sup>+</sup>CD8<sup>+</sup>Vα2<sup>+</sup> populations for each group are displayed (n=3). (B) Expression of co-stimulatory markers in WT or CAV1<sup>-/-</sup> DCs. The expression of C14, CD40, CD80, CD86, PD-L1, CCR7, CD38 and MHC-I was determined by flow cytometry. Data are the mean of relative expression ± SD compared with non-treated (NT) (\* = p<0.05, n = 3-6).

(C) Cytokine secretion (IL-6, IL-12 and TNF- $\alpha$ ) by DCs after stimulation for 24 h with LPS (100 ng/ml) was determined by ELISA. Bars are the mean  $\pm$  SD compared with non-treated (NT) (\* =  $p < 0.05$ ,  $n = 3$ ).
